# Supplementary material for: A Multidisciplinary Approach Establishes a Link between Transglutaminase 2 and the Kv10.1 Voltage-Dependent K+ Channel in Breast Cancer
Source: MDPI journal article supplement (doi:10.3390/cancers15010178), 2022-12-28
Supplement: s1 [file s1]

# File S1

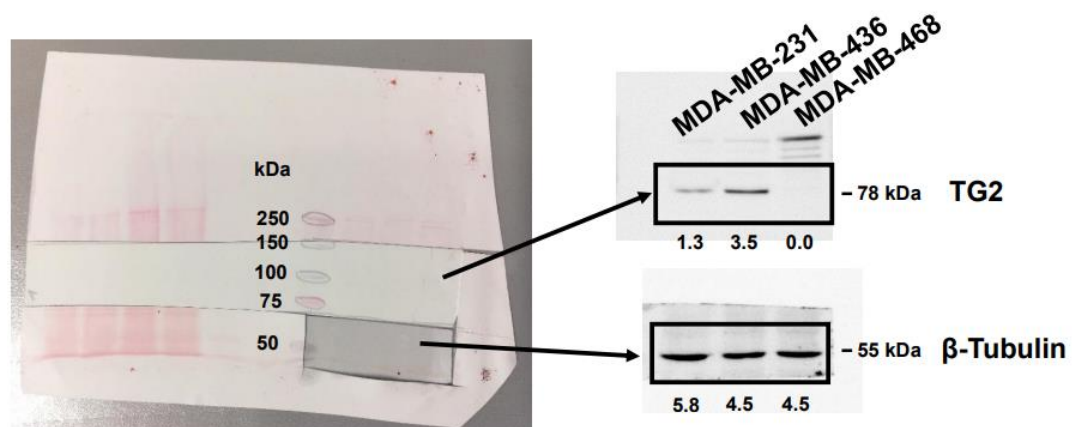

**Figure S2.** The original western blots of Figure 1C.

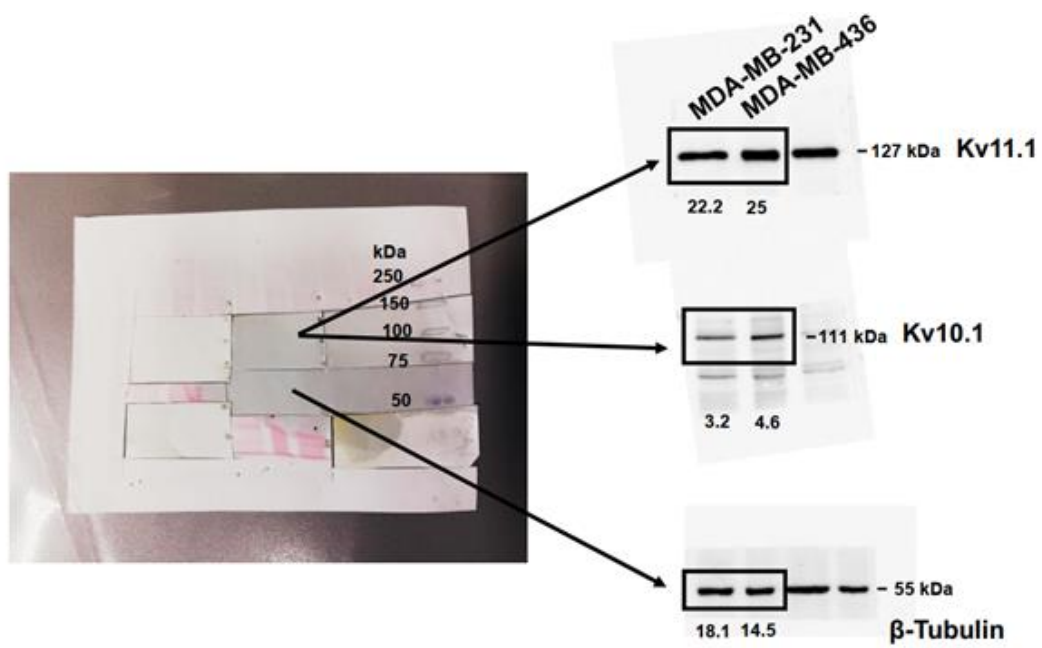

**Figure S3.** The original western blots of Figure 5A.

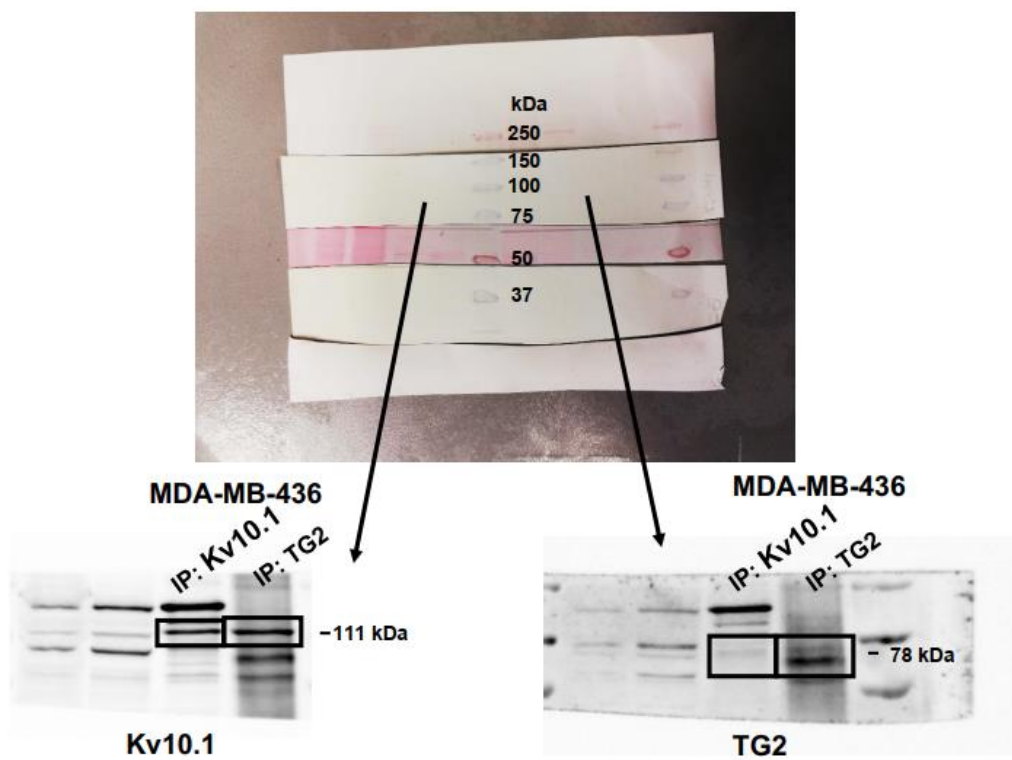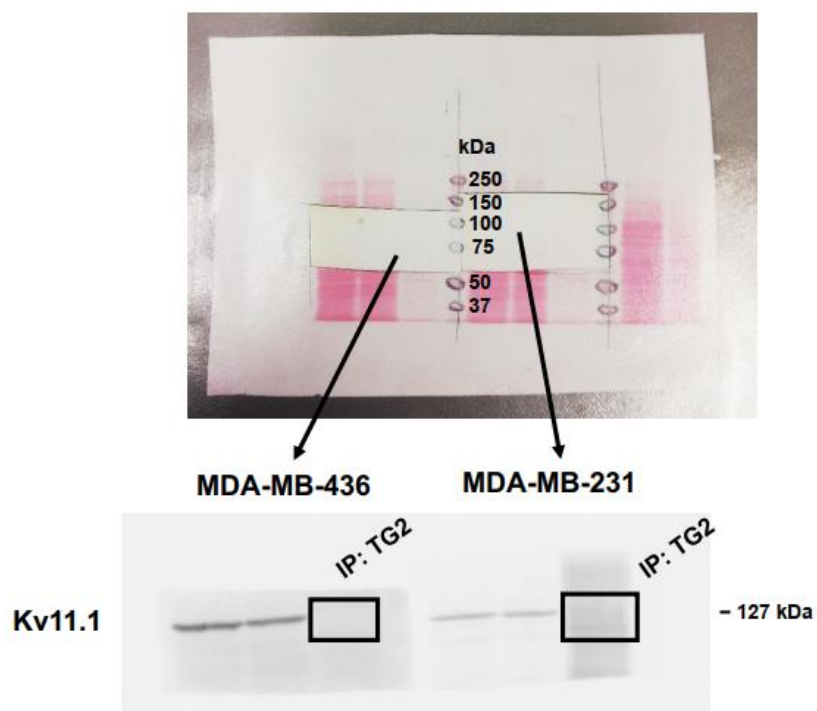

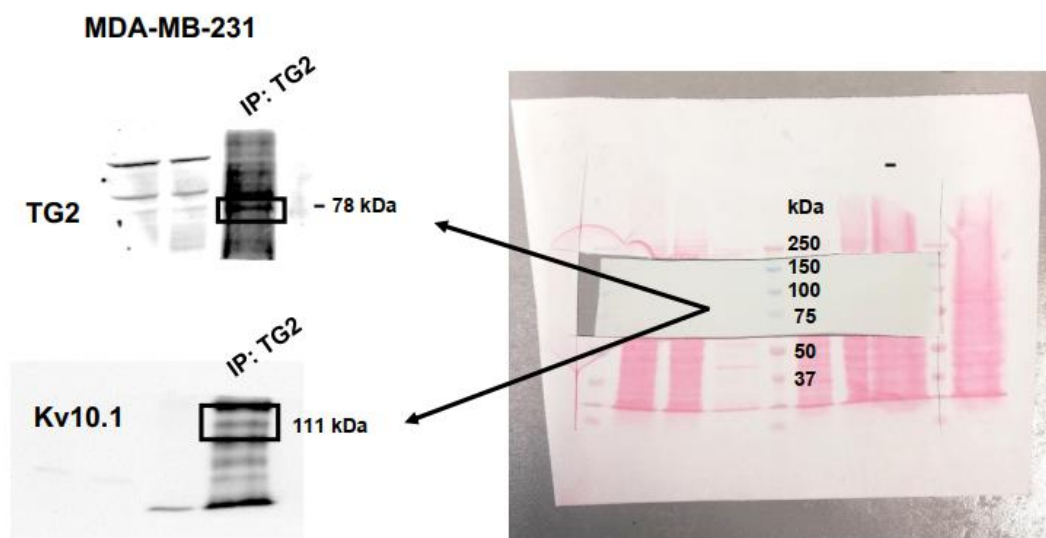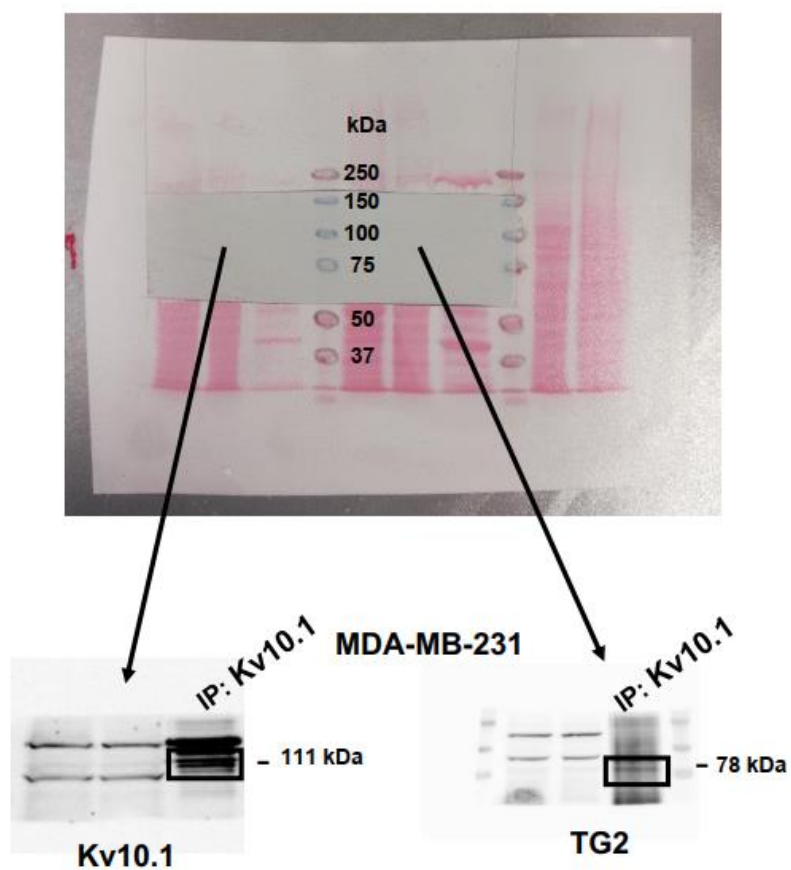

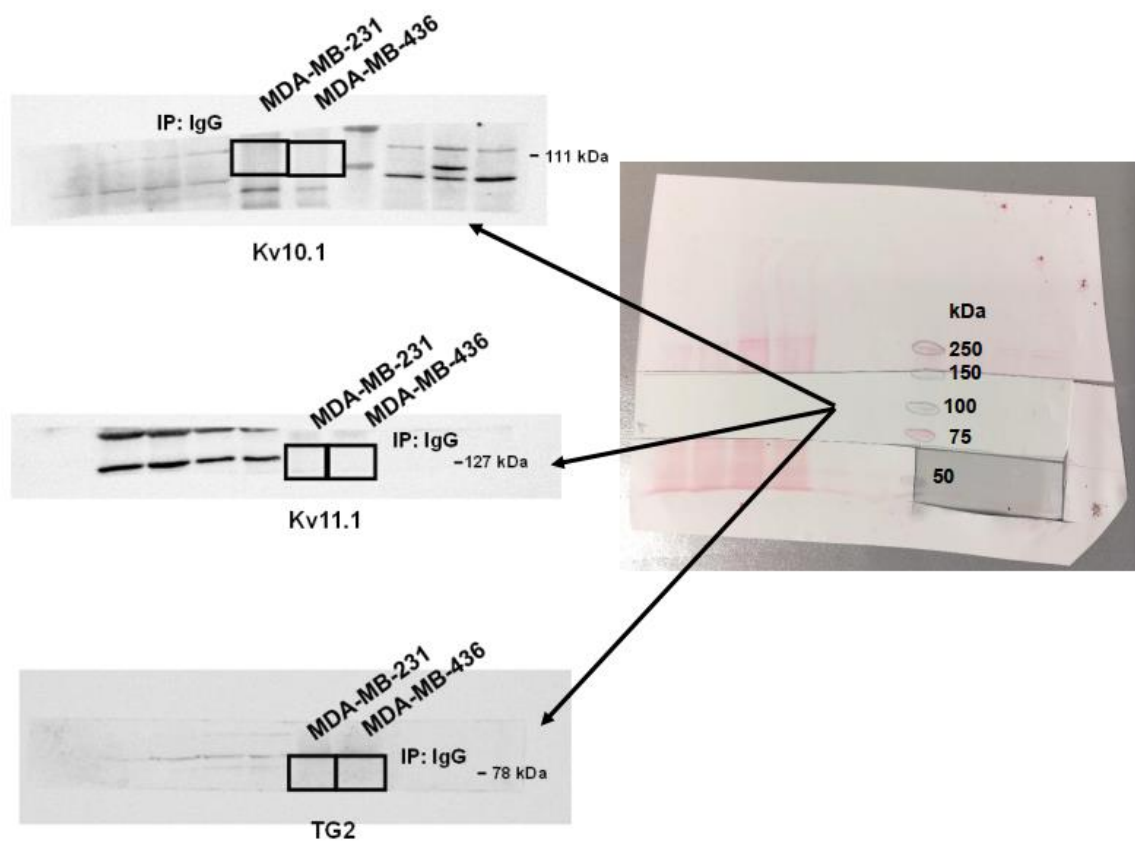

**Figure S4.** The original western blots of Figure 5C and Figure 5D.
