# Supplementary figures and images for: A Multidisciplinary Approach Establishes a Link between Transglutaminase 2 and the Kv10.1 Voltage-Dependent K+ Channel in Breast Cancer
Source: MDPI journal article supplement (doi:10.3390/cancers15010178), 2022-12-28

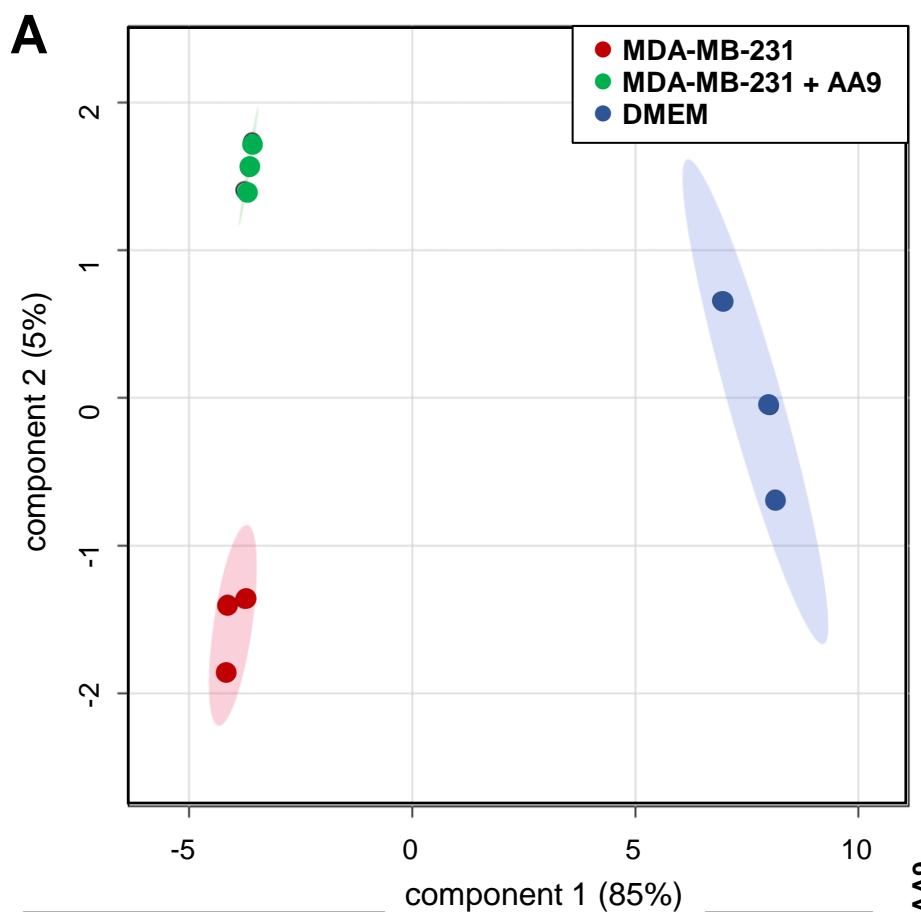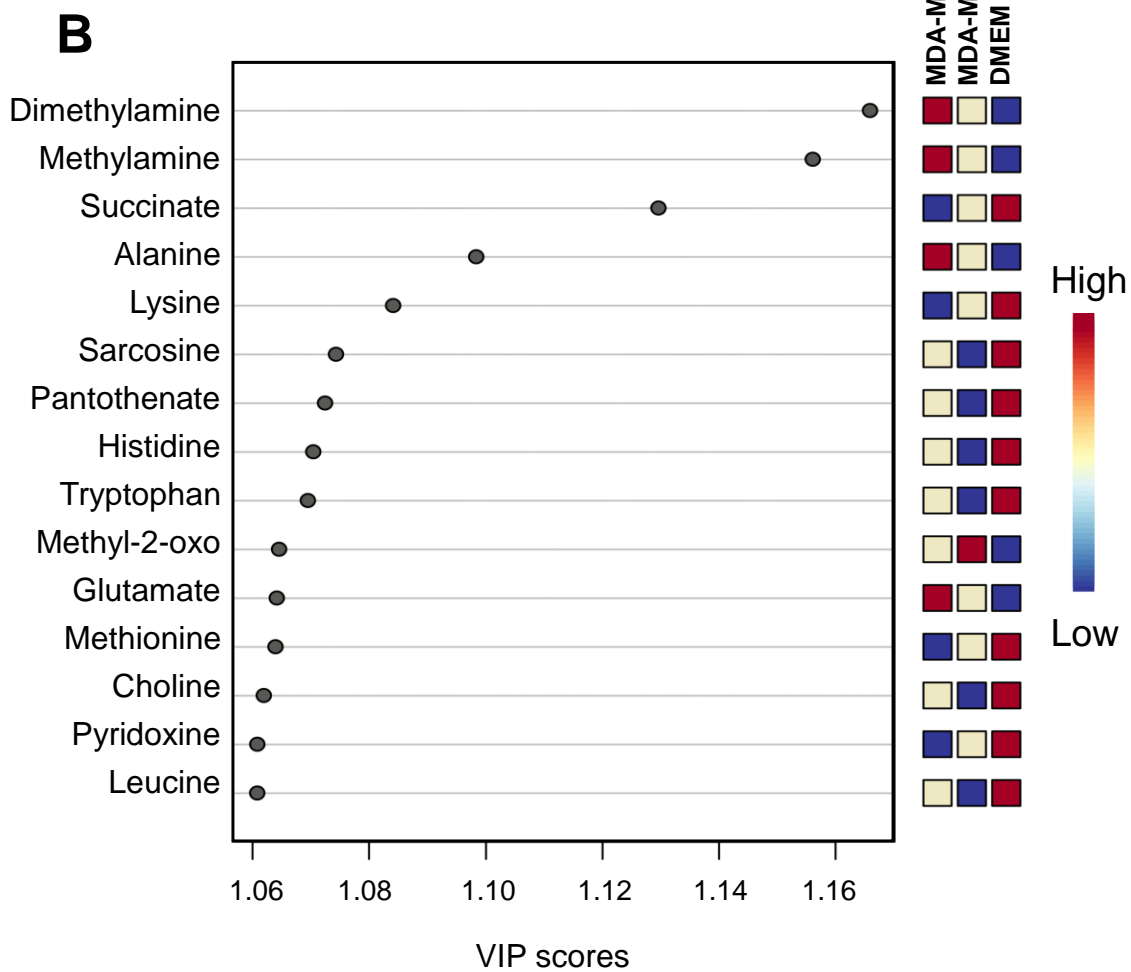

Supplement: s1 [file s1]
